# Supplementary material for: Contributions of Alveolar Bone Density and Habitual Chewing Side to the Unilateral Failure of Orthodontic Mini-Screws: A Cross-Sectional Study
Source: MDPI journal article supplement (doi:10.3390/app14073041), 2024-04-04
Supplement: s1 [file s1]

**Supple. Table 1** Descriptive statistics for the successful and unsuccessful sides.

|                                    | Success side |        | Unsuccess side |        | P-value |
|------------------------------------|--------------|--------|----------------|--------|---------|
|                                    | mean         | S.D.   | mean           | S.D.   |         |
| Cortical bone thickness (mm)       | 1.01         | 0.27   | 0.93           | 0.27   | 0.085   |
| Bone density (mg/cm <sup>3</sup> ) | 1317.89      | 332.23 | 1059.64        | 202.64 | * 0.002 |

\*:  $p < 0.05$ **Supple. Table 2** Descriptive statistics for the divided three groups.

|                                    |        | min.   | max.   | ave.             |
|------------------------------------|--------|--------|--------|------------------|
| Cortical bone thickness (mm)       |        |        |        |                  |
|                                    | Grp. 1 | 0.47   | 0.85   | 0.71 ± 0.11      |
|                                    | Grp. 2 | 0.86   | 1.05   | 0.97 ± 0.054     |
|                                    | Grp. 3 | 1.07   | 1.78   | 1.27 ± 0.20      |
| Bone density (mg/cm <sup>3</sup> ) |        |        |        |                  |
|                                    | Grp. 1 | 674.7  | 1073.1 | 891.7 ± 110.4    |
|                                    | Grp. 2 | 1078.6 | 1228.9 | 1149.22 ± 46.66  |
|                                    | Grp. 3 | 1229.4 | 1910.3 | 1506.65 ± 238.91 |

**Supple. Table 3** Descriptive statistics for the right and left sides.

|                              | Right |      | Left |      | P-value |
|------------------------------|-------|------|------|------|---------|
|                              | mean  | S.D. | mean | S.D. |         |
| Cortical bone thickness (mm) | 0.97  | 0.29 | 0.97 | 0.25 | 0.920   |
